# Supplementary figures and images for: Novel self-promoted phthalonitrile monomer with siloxane segments: synthesis, curing kinetics, and thermal properties
Source: Royal Society of Chemistry journal article supplement (doi:10.1039/d1nj05656e), 2022-01-01

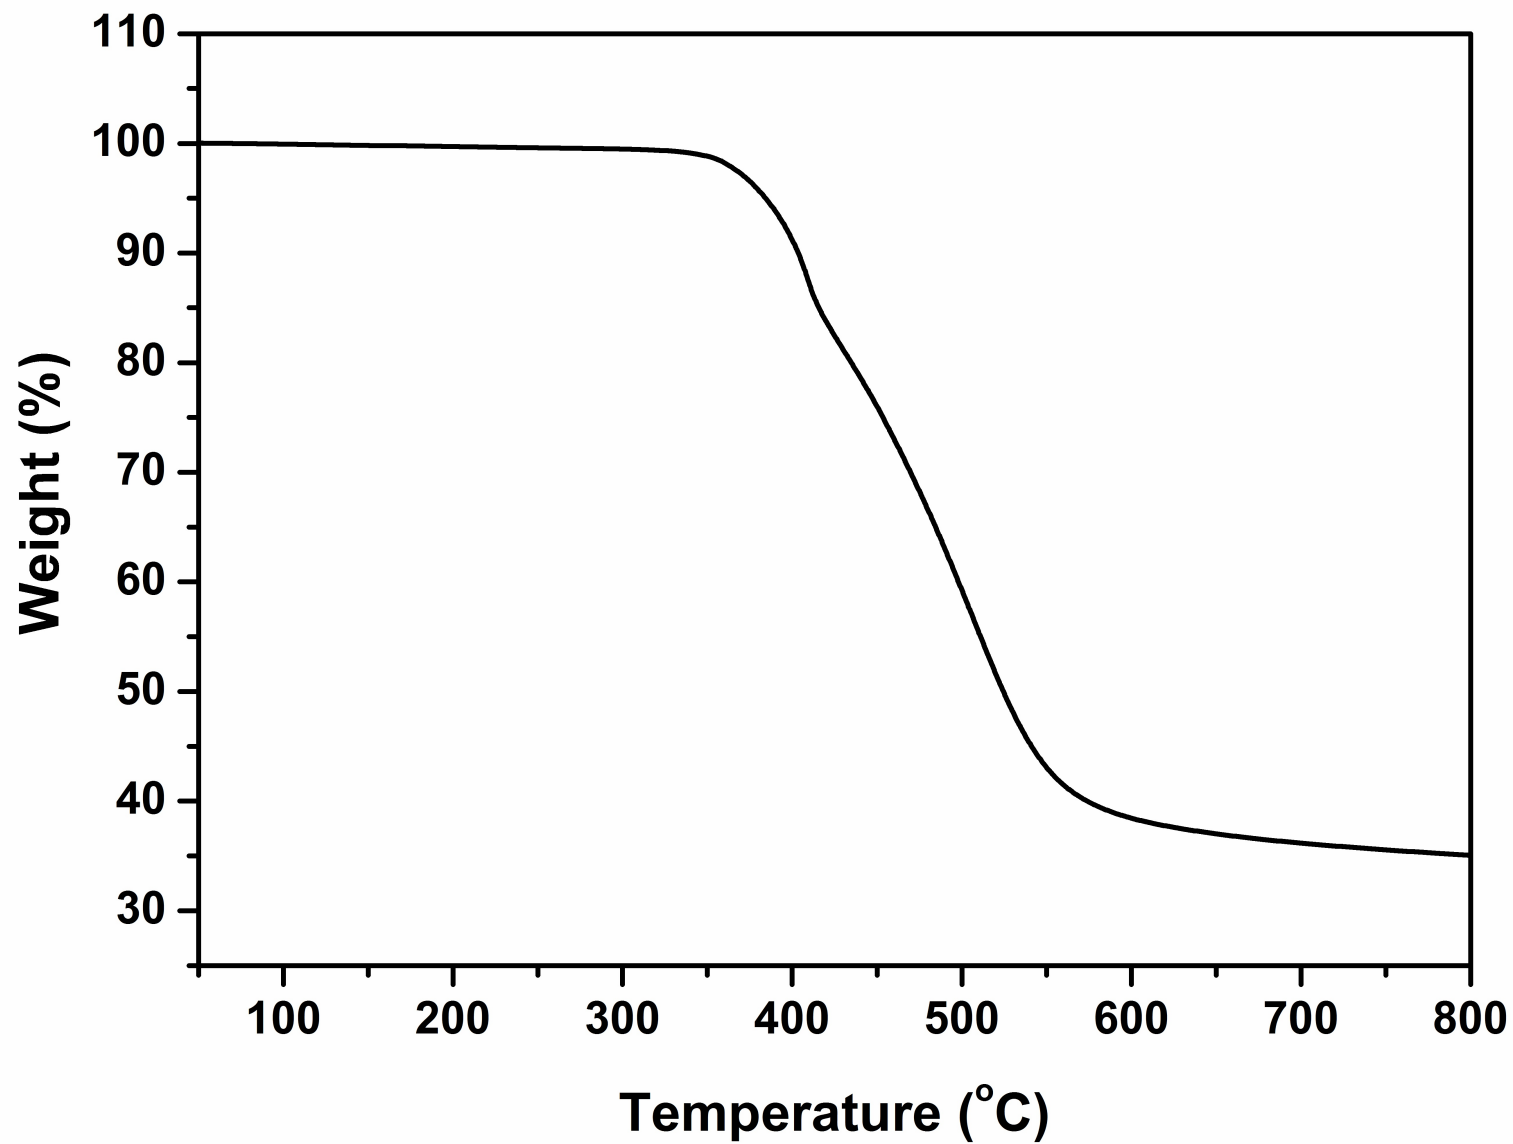

Supplement: d1nj05656e1.pdf [file d1nj05656e1.pdf]

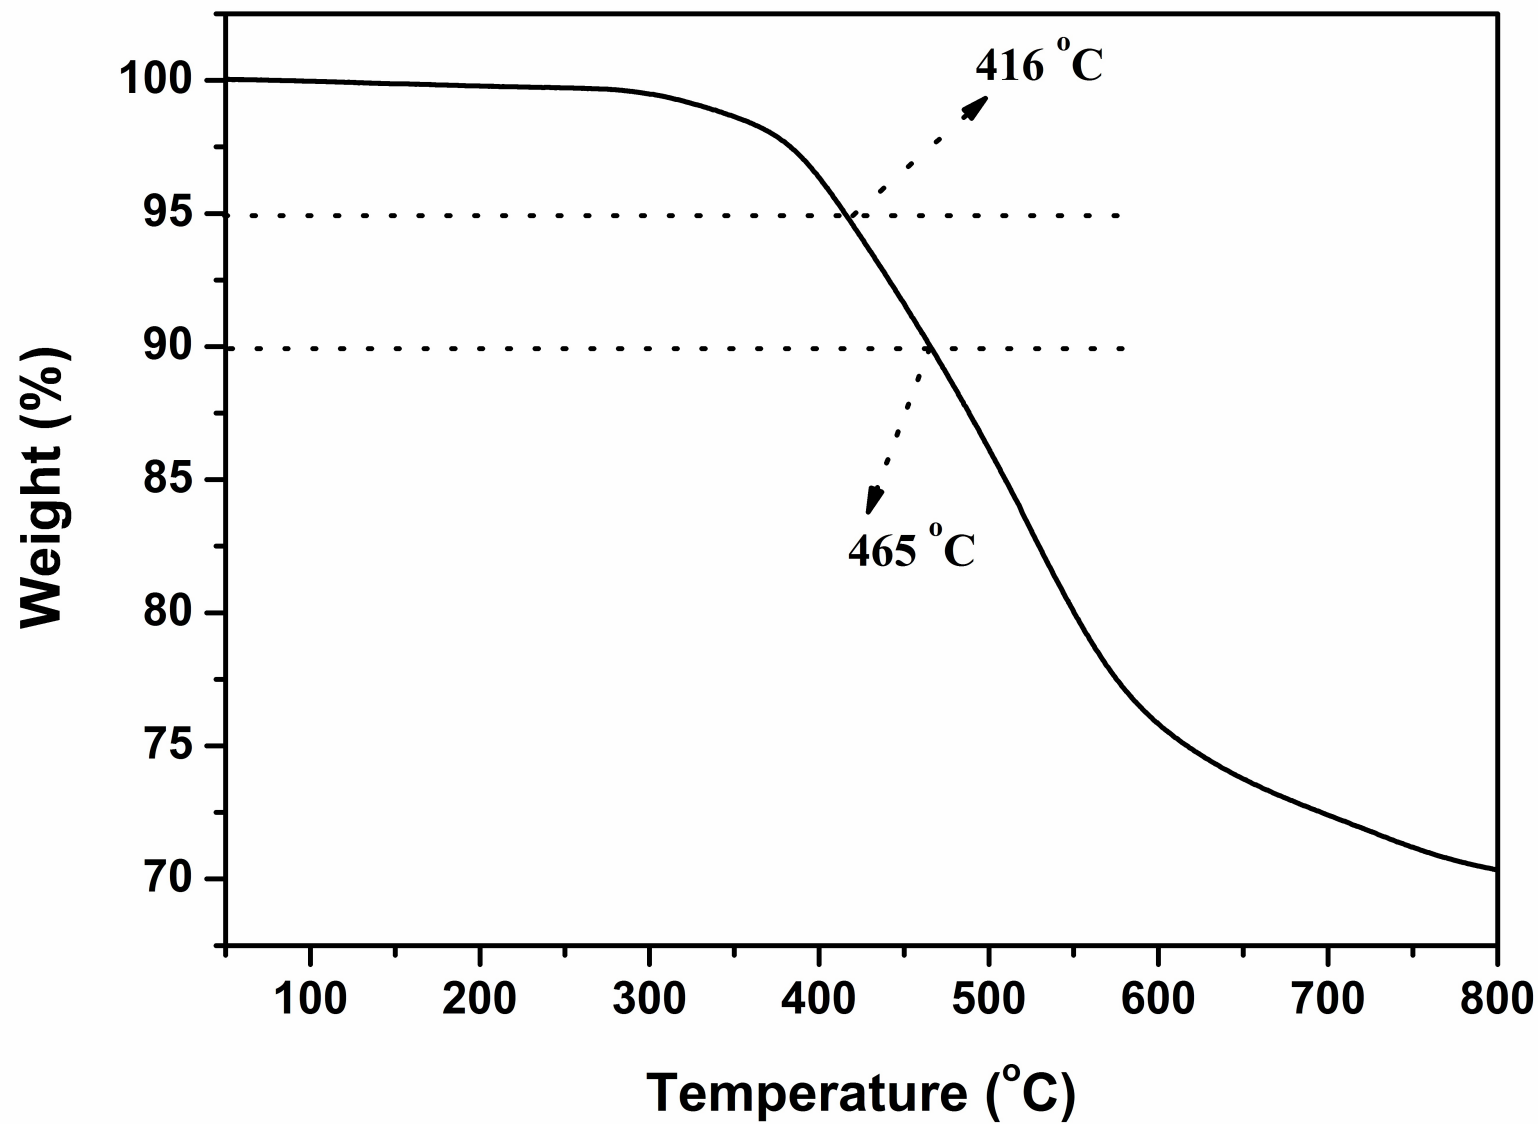

Supplement: d1nj05656e2.pdf [file d1nj05656e2.pdf]
